## SUPPLEMENTARY MATERIAL

*Mason KE, McHale P, Pennington A, Maudsley G, Day J, Barr B.* Age-adjusted associations between comorbidity and outcomes of COVID-19: a review of the evidence.

### Appendix 1.

#### **MEDLINE Full Text Search strategy for review of age-adjusted associations between comorbidity and outcomes of COVID-19**

MEDLINE with Full Text 07-04-20 Via EBSCOhost, limited to English Language (Dec 2019-April 2020)

TI ( (“Wuhan coronavirus” OR COVID19 OR COVID-19 OR COVID-2019 OR COVID 19 OR COVID 2019 OR “coronavirus disease 2019” OR SARS-CoV-2 OR SARS2 OR 2019-nCoV OR “novel coronavirus” OR “severe acute respiratory syndrome coronavirus 2” OR “severe acute respiratory syndrome coronavirus-2” OR coronavirus-2 OR “coronavirus disease-19” OR coronavirus disease-19 OR SARS-CoV-2019 OR SARS-CoV-19) ) AND TX ( (mortality OR mortalities OR fatality OR fatalities OR death OR ventilation OR ventilated OR “clinical outcome” “clinical characteristic” ICU OR “critical care” OR “intensive care” OR intubated OR intubation OR “hospital admission” OR “admitted to hospital” OR cardio OR cardiac OR heart OR diabetes OR “chronic obstructive” OR COPD OR hypertension OR cancer OR renal OR kidney OR hepatitis OR immunodeficiency OR comorbid\* OR underlying OR pre-existing OR pre-existing OR liver OR obesity OR BMI OR severity) ) AND TX ( (“by age” OR “age adjusted” OR “age specific” OR “age stratified” OR “age standardised” OR “age standardized” OR “age-adjusted” OR “age-specific” OR “adjusting for age” OR “adjustment for age” OR “after adjusting” OR “after adjustment” OR “after-adjusting” OR “after-adjustment” OR multivaria\* OR multi-varia\*) )

#### **Additional searches of national organisations and repositories**

Searched 07/04/2020

- World Health Organization
- Centres for Disease Control and Prevention, USA
- NHS England and NHS Improvement
- Public Health England
- European Centre for Disease Prevention and Control
- Chinese Center for Disease Control and Prevention

Searched 14/04/2020

- Oxford COVID 19 Evidence Service (<https://www.cebm.net/covid-19/>)
- COVID-19 Scientific Resource Centre: Geneva Centre for Education and Research in Humanitarian Action ([https://cerahgeneve.ch/resources/covid-19-free-online-scientific-resources/?\\_ga=2.226059738.1105476567.1584628506-799341908.1584628506](https://cerahgeneve.ch/resources/covid-19-free-online-scientific-resources/?_ga=2.226059738.1105476567.1584628506-799341908.1584628506))

## Appendix 2.

### List of included studies

\*Cai Q, Chen F, Luo F, Liu X, Wang T, Wu Q, et al. Obesity and COVID-19 severity in a designated hospital in Shenzhen, China. *The Lancet Infectious Diseases*. 2020 Available at: <http://dx.doi.org/10.2139/ssrn.3556658>.

Chen J, Qi T, Liu L, Ling Y, Qian Z, Li T, et al. Clinical progression of patients with COVID-19 in Shanghai, China. *Journal of Infection*. 2020;80(5):e1-e6.

Guan WJ, Liang WH, Zhao Y, Liang HR, Chen ZS, Li YM, et al. Comorbidity and its impact on 1590 patients with Covid-19 in China: A Nationwide Analysis. *European Respiratory Journal*. 2020.

Shi S, Qin M, Shen B, Cai Y, Liu T, Yang F, et al. Association of cardiac injury with mortality in hospitalized patients with COVID-19 in Wuhan, China. *JAMA Cardiology*. 2020.

Shi Y, Yu X, Zhao H, Wang H, Zhao R, Sheng J. Host susceptibility to severe COVID-19 and establishment of a host risk score: findings of 487 cases outside Wuhan. *Critical Care*. 2020;24(1):108.

\*Zhang Y, Cui Y, Shen M, Zhang J, Liu B, Dai M, et al. Comorbid diabetes mellitus was associated with poorer prognosis in patients with COVID-19: a retrospective cohort study. *medRxiv*. 2020; Available at: <https://doi.org/10.1101/2020.03.24.20042358>

Zhou F, Yu T, Du R, Fan G, Liu Y, Liu Z, et al. Clinical course and risk factors for mortality of adult inpatients with COVID-19 in Wuhan, China: a retrospective cohort study. *The Lancet*. 2020;395(10229):1054-62.

\* pre-print article, not peer-reviewed
